# Supplementary material for: Gene silencing in adult Popillia japonica through feeding of double‐stranded RNA (dsRNA) complexed with branched amphiphilic peptide capsules (BAPCs)
Source: PubMed Central journal article supplement (PMC10926504; doi:10.3389/finsc.2023.1151789), 2023-05-12
Supplement: Image_1.pdf [file Image_1.pdf]

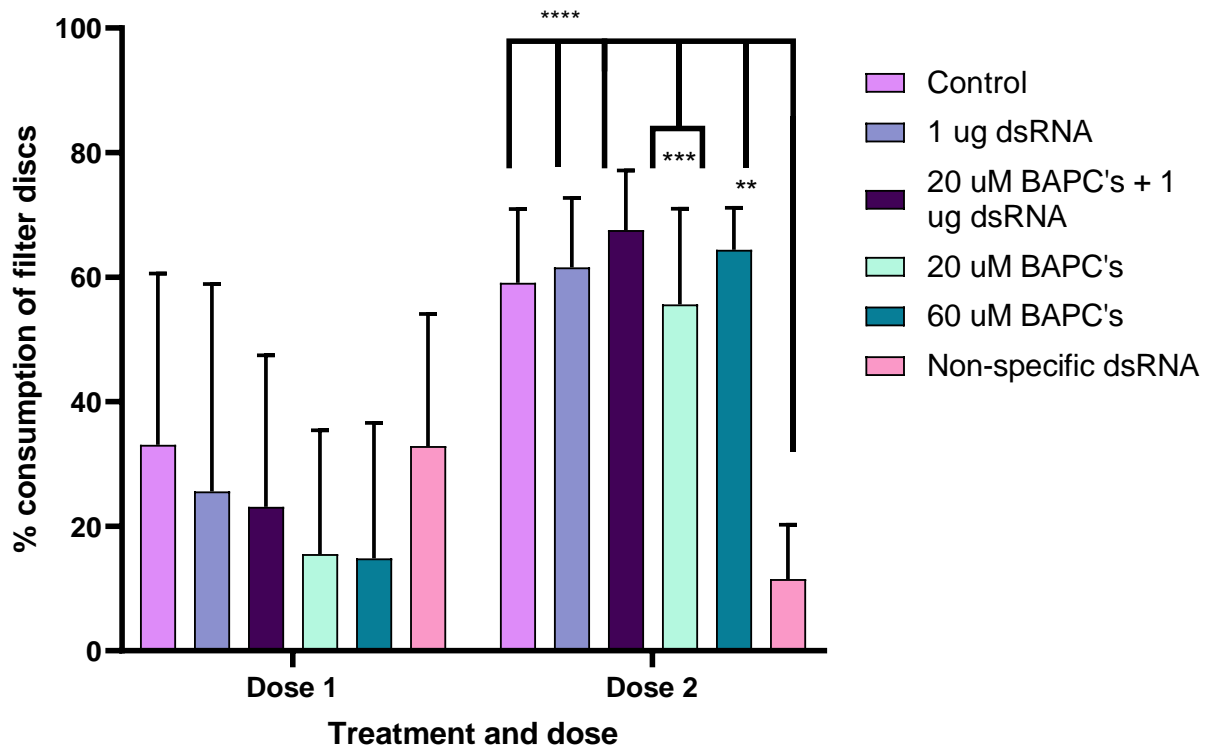

Supplementary Figure 1. Graph illustrating the mean percentage of the filter paper eaten by adult 740 *P. japonica* within 24 hr. Differences between values were compared by one-way ANOVA using Tukey's test as a post-test. Statistical significance: (\*)  $P < 0.05$ ; (\*\*)  $P < 0.01$ , (\*\*\*)  $P < 0.001$ , (\*\*\*\*)  $P < 0.0001$ . Non-statistical significance (ns) was considered when  $P > 0.05$ .
